# Supplementary material
Source: publisher figshare collection journal article supplement (https://tandf.figshare.com/ndownloader/files/13247738)
Supplement: Supplementary file 1 [file 13247738]

Supplemental Table 1. Overview of QCMD samples used in the present study

| **Nr** | **Sample namel** | **Target** | **Core/ educational** | **Specification** | **Seegene Allplex** | | **Correct** |
| --- | --- | --- | --- | --- | --- | --- | --- |
| **Result** | **Cq** |  |
| 1 | ADV 17-02 | Adenovirus | Core | serotype 1 | Adenovirus | 33.24 | Yes |
| 2 | BP 17-05 | *B. pertussis* | core | Saline | *B. pertussis* | 41.30 | Yes |
| 3 | BP 17-06 | *B. pertussis* | core | Liquid amies | *B. pertussis* | 40.49 | Yes |
| 4 | BP 17-08 | *B. holmessi* | Educational | Saline | Negative | (-) | Yes |
| 5 | BP 17-09 | *B. parapertussis* | core | Saline | *B. parapertussis* | 30.34 | Yes |
| 6 | COR 15-05 | Coronavirus OC43 | core | TM | COR OC43 | 30.73 | Yes |
| 7 | COR 15-06 | Negative | core | TM | Negative | (-) | Yes |
| 8 | COR 15-09 | Coronavirus NL63 | core | TM | COR NL63 | 30.29 | Yes |
| 9 | COR 15-10 | Coronavirus 229E | core | TM | COR 229E | 30.76 | Yes |
| 10 | CP 10-02 | *C. pneumoniae* | core | 4.9 IFU/100µL–STM | *C. pneumoniae* | 31.80 | Yes |
| 11 | CP 10-04 | Negative | core | STM | Negative | (-) | Yes |
| 12 | CP 10-07 | *C. pneumoniae* | core | 4.9 IFU/100µL–BAL | *C. pneumoniae* | 35.11 | Yes |
| 13 | EV 11-09 | Coxsackie A21 | Core | 1x10-5 | Enterovirus | 36.27 | Yes |
| 14 | EV 17-08 | Negative | Core | TM | Negative | (-) | Yes |
| 15 | EV 17-09 | Enterovirus 68 | Core | TM | Enterovirus | 32.86 | Yes |
| 16 | EV 17-10 | Enterovirus 71 | Core | TM | Enterovirus | 32.87 | Yes |
| 17 | INF 13-01 | Influenza A H5N1 | NS | 1x10-4 | FLUA | 37.50 | Yes |
| 18 | INF 13-05 | Negative | NS | (-) | Negative | (-) | Yes |
| 19 | INF 13-06 | Influenza A H1N1 | NS | 1x10-5 | Influenza A H1pdm09 | 37.31+36.73 | Yes |
| 20 | INF 13-07 | Influenza A H3N2 | NS | 1x10-4 | Influenza A H3 | 41.00+38.44 | Yes |
| 21 | INF 13-08 | Influenza B | NS | 1x10-6 | Influenza B | 38.00 | Yes |
| 22 | INF 13-09 | Influenza A H1N1 | NS | 1x10-4 | Influenza A H1pdm09 | 35.51+33.14 | Yes |
| 23 | INF 13-11 | Influenza B | NS | 1x10-6 | Influenza B | 34.52 | Yes |
| 24 | INF 13-12 | Influenza A H3N2 | NS | 1x10-3 | Influenza A H3 | 35.87+33.58 | Yes |
| 25 | MP 17-01 | *M. pneumoniae* | NS | Synthetic BAL | *M. pneumoniae* | 34.51 | Yes |
| 26 | MP 17-05 | *M. pneumoniae* | NS | Synthetic BAL | *M. pneumoniae* | 35.37 | Yes |
| 27 | MPV 17-01 | HMPV A1 DS1_2 | core | TM | HMPV | 34.33 | Yes |
| 28 | MPV 17-04 | HMPV A2 | Core | TM | HMPV | 30.28 | Yes |
| 29 | MPV 17-06 | HMPV B2 | Core | TM | HMPV | 29.38 | Yes **1** |
| 30 | PINF06-01 | Parainfluenza 1 | NS | Target Cq 31-33 | Parainfluenza 1 | 33.54 | Yes |
| 31 | PINF06-02 | Parainfluenza 2 | NS | Target Cq 30 | Parainfluenza 2 | 28.22 | Yes |
| 32 | PINF06-03 | N Negative | NS | Ct>40 | N Negative | (-) | Yes |
| 33 | PINF06-06 | Parainfluenza 4 | NS | Target Cq 34-35 | Parainfluenza 4 | 33.99 | Yes |
| 34 | PINF16-07 | Parainfluenza 3 | educational | STM | Parainfluenza 3 | 32.75 | Yes |
| 35 | RSV 08-01 | RSV B | NS | 1x10-3.5 | RSV B | 39.25 | Yes |
| 36 | RSV 08-03 | RSV A | NS | 1x10-1 | RSV A | 28.62 | Yes |
| 37 | RSV 08-04 | RSV B | NS | 1x10-2.5 | RSV B | 29.64 | Yes |
| 38 | RSV 08-06 | RSV A | NS | 1x10-2.5 | RSV A | 35.75 | Yes **1** |
| 39 | RSV 08-10 | Negative | NS | -- | Negative | (-) | Yes |
| 40 | RSV 08-12 | HMPV B2 | NS | 1 x 10-4 | HMPV | 35.20 | Yes |
| 41 | RV 13-05 | Rhinovirus A16 | NS | 1x10-4.5 | Rhinovirus | 35.60 | Yes |
| 42 | RV 13-07 | Rhinovirus B5 | NS | 1x10-3 | Rhinovirus | 30.68 | Yes |
| 43 | RV 13-11 | Rhinovirus C | NS | 1x10-2 | Rhinovirus | 29.63 | Yes |

1 These samples tested negative in an initial analysis but rendered correct results on repeat PCR analysis using the same nucleic acid extracts. HMPV: Human metapneumovirus; RSV: Respiratory Syncytial virus; NS: not specified; IFU =Inclusion forming units; (S)TM = (Sample) Transport Medium; BAL = Broncho-alveolaire lavage.
